# Supplementary material for: Towards novel herbicide modes of action by inhibiting lysine biosynthesis in plants
Source: eLife. 2021 Jul 27;10:e69444. doi: 10.7554/eLife.69444 (PMC8341977; doi:10.7554/eLife.69444)
Supplement: Figure 4—source data 1. [file elife-69444-fig4-data1.xlsx]

## Sheet: Sheet1
AtDHDPS1 Vs. MBDTA-1 (Figure 4A)
	Biological Replicate Average				Plotted Data						IC50
Inhibitor Conc. (µM)	Rep 1	Rep 2	Rep 3		Inhibitor Conc. (M)	Log10 (Inhibitor Conc.)	MEAN	SD	SEM			Bio Rep 1	Bio Rep 2	Bio Rep 3	MEAN	SD	SEM
500	1.19806	2.1506	0.320919		0.0005	-3.30103	1.22319	0.747174	0.431381		IC50 (M)	0.0001204	0.0001234	0.0001354
250	1.83179	1.60745	6.56677		0.00025	-3.60206	3.33533	2.2868	1.32029		IC50 (µM)	120.4	123.4	135.4	126.4	6.48074	3.74166
200	7.82871	9.43673	19.6305		0.0002	-3.69897	12.2987	5.22582	3.01713
150	21.1707	35.8575	46.0557		0.00015	-3.82391	34.3613	10.2142	5.89718
125	54.1748	55.5971	59.3366		0.000125	-3.90309	56.3695	2.17692	1.25684
100	70.8775	64.4011	72.1925		0.0001	-4	69.157	3.40555	1.9662
80	80.4512	79.7711	79.9992		8e-05	-4.09691	80.0738	0.282648	0.163187
60	91.4326	92.1995	91.4201		6e-05	-4.22185	91.6841	0.364518	0.210455
40	96.4626	99.0072	100.775		4e-05	-4.39794	98.7483	1.7701	1.02197
20	98.8722	99.9195	102.226		2e-05	-4.69897	100.339	1.401	0.808868
0	100	100	100
AtDHDPS1 Vs. MBDTA-2 (Figure 4A)
	Biological Replicate Average				Plotted Data						IC50
Inhibitor Conc. (µM)	Rep 1	Rep 2	Rep 3		Inhibitor Conc. (M)	Log10 (Inhibitor Conc.)	MEAN	SD	SEM			Bio Rep 1	Bio Rep 2	Bio Rep 3	MEAN	SD	SEM
500	0.291644	1.21527	0.692163		0.0005	-3.30103	0.733025	0.378173	0.218338		IC50 (M)	6.482e-05	6.617e-05	5.901e-05
250	0.293024	3.12612	0.82765		0.00025	-3.60206	1.4156	1.22906	0.709597		IC50 (µM)	64.82	66.17	59.01	63.3333	3.10634	1.79345
125	14.0834	5.09305	9.83004		0.000125	-3.90309	9.66881	3.67205	2.12006
100	24.8388	14.9017	25.2464		0.0001	-4	21.6623	4.78334	2.76166
80	37.6717	33.8799	40.4887		8e-05	-4.09691	37.3468	2.70779	1.56334
60	59.0725	63.9976	53.5129		6e-05	-4.22185	58.861	4.28297	2.47277
40	73.6963	80.7571	68.1012		4e-05	-4.39794	74.1849	5.17827	2.98967
20	93.4055	94.438	81.0717		2e-05	-4.69897	89.6384	6.07221	3.50579
10	95.3035	102.265	99.7533		1e-05	-5	99.1071	2.87833	1.66181
5	99.7702	102.122	98.8567		5e-06	-5.30103	100.25	1.37538	0.794078
0	100	100	100
AtDHDPS2 Vs. MBDTA-1 (Figure 4B)
	Biological Replicate Average				Plotted Data						IC50
Inhibitor Conc. (µM)	Rep 1	Rep 2	Rep 3		Inhibitor Conc. (M)	Log10 (Inhibitor Conc.)	MEAN	SD	SEM			Bio Rep 1	Bio Rep 2	Bio Rep 3	MEAN	SD	SEM
500	0.74718	0.44306	0.642663		0.0005	-3.30103	0.610968	0.126163	0.0728402		IC50 (M)	0.0001307	0.0001275	0.0001209
250	1.8108	2.51239	2.45639		0.00025	-3.60206	2.25986	0.318353	0.183801		IC50 (µM)	130.7	127.5	120.9	126.367	4.0803	2.35577
200	15.0074	10.782	13.6502		0.0002	-3.69897	13.1465	1.76139	1.01694
150	39.278	36.2208	35.9509		0.00015	-3.82391	37.1499	1.50882	0.87112
125	57.3552	54.4517	53.8083		0.000125	-3.90309	55.2051	1.54291	0.890798
100	75.3686	74.5269	62.959		0.0001	-4	70.9515	5.66197	3.26894
80	82.3532	81.0634	74.724		8e-05	-4.09691	79.3802	3.33429	1.92505
60	85.9091	92.1362	87.7593		6e-05	-4.22185	88.6015	2.61101	1.50747
40	96.9951	99.549	101.088		4e-05	-4.39794	99.2109	1.68816	0.974659
20	97.6929	107.115	98.5359		2e-05	-4.69897	101.115	4.25708	2.45783
0	100	100	100
AtDHDPS2 Vs. MBDTA-2 (Figure 4B)
	Biological Replicate Average				Plotted Data						IC50
Inhibitor Conc. (µM)	Rep 1	Rep 2	Rep 3		Inhibitor Conc. (M)	Log10 (Inhibitor Conc.)	MEAN	SD	SEM			Bio Rep 1	Bio Rep 2	Bio Rep 3	MEAN	SD	SEM
500	0.788266	0.433182	1.98977		0.0005	-3.30103	1.07041	0.666057	0.384548		IC50 (M)	6.182e-05	6.602e-05	6.426e-05
250	1.83843	0.478948	1.81147		0.00025	-3.60206	1.37628	0.634606	0.36639		IC50 (µM)	61.82	66.02	64.26	64.0333	1.72212	0.994265
200	6.39979	7.81442	11.2377		0.0002	-3.69897	8.48396	2.03101	1.1726
150	17.7945	20.1207	28.7922		0.00015	-3.82391	22.2358	4.73236	2.73223
125	31.4062	41.2545	48.4571		0.000125	-3.90309	40.3726	6.98889	4.03504
100	59.3017	59.1689	58.2581		0.0001	-4	58.9096	0.463854	0.267806
80	73.0461	79.2666	67.9037		8e-05	-4.09691	73.4055	4.64582	2.68227
60	93.3615	88.3275	83.0686		6e-05	-4.22185	88.2525	4.20238	2.42625
40	102.228	98.4235	99.255		4e-05	-4.39794	99.9687	1.63302	0.942827
20	99.9847	101.713	100.605		2e-05	-4.69897	100.768	0.714655	0.412606
0	100	100	100
