# Supplementary material for: Towards novel herbicide modes of action by inhibiting lysine biosynthesis in plants
Source: eLife. 2021 Jul 27;10:e69444. doi: 10.7554/eLife.69444 (PMC8341977; doi:10.7554/eLife.69444)
Supplement: Figure 6—source data 1. [file elife-69444-fig6-data1.xlsx]

## Sheet: Sheet1
HepG2 Cells Vs. MBDTA-1/2 (Figure 6A)
	Biological Replicate Average				Plotted Data
Inhibitor Conc.	Rep 1	Rep 2	Rep 3		MEAN	SD	SEM
400 µM MBDTA-1	76.2175	87.9002	87.5146		83.8774	6.63647	3.83157
200 µM MBDTA-1	84.1726	96.4551	92.8846		91.1708	6.31806	3.64773
100 µM MBDTA-1	80.2593	89.257	82.2302		83.9155	4.72964	2.73066
50 µM MBDTA-1	106.424	89.8854	98.6831		98.3308	8.27488	4.7775
400 µM MBDTA-2	82.1353	84.8756	92.4818		86.4976	5.36054	3.09491
200 µM MBDTA-2	78.7004	110.399	94.3509		94.4836	15.8499	9.15095
100 µM MBDTA-2	111.079	105.753	84.8444		100.559	13.8673	8.00629
50 µM MBDTA-2	102.431	91.9676	103.96		99.453	6.52748	3.76864
100 µM Defensin	15.362	13.6768	15.562		14.8669	1.03555	0.597874
HEK293 Cells Vs. MBDTA-1/2 (Figure 6B)
	Biological Replicate Average				Plotted Data
Inhibitor Conc.	Rep 1	Rep 2	Rep 3		MEAN	SD	SEM
400 µM MBDTA-1	72.3167	105.713	85.5787		87.8693	16.8153	9.70833
200 µM MBDTA-1	82.512	89.8334	94.3451		88.8968	5.97185	3.44785
100 µM MBDTA-1	84.1658	92.6943	91.6317		89.4972	4.64765	2.68332
50 µM MBDTA-1	78.4821	80.3927	92.2097		83.6948	7.4357	4.293
400 µM MBDTA-2	96.4279	91.3418	89.0843		92.2847	3.7615	2.1717
200 µM MBDTA-2	82.6655	86.0109	84.8958		84.5241	1.70342	0.983467
100 µM MBDTA-2	105.648	102.575	82.8286		97.0172	12.3834	7.14955
50 µM MBDTA-2	92.3209	100.589	90.7878		94.566	5.27234	3.04399
100 µM Defensin	14.6127	15.3191	16.8765		15.6028	1.15827	0.668729
