# Supplementary material for: Towards novel herbicide modes of action by inhibiting lysine biosynthesis in plants
Source: eLife. 2021 Jul 27;10:e69444. doi: 10.7554/eLife.69444 (PMC8341977; doi:10.7554/eLife.69444)
Supplement: Figure 7—source data 1. [file elife-69444-fig7-data1.xlsx]

## Sheet: Sheet1
Arabidopsis thaliana Vs. MBDTA-1 (Figure 7A)
	Biological Replicate Average				Plotted Data							EC50
Inhibitor Conc. (µM)	Rep 1	Rep 2	Rep 3		Inhibitor Conc. (M)	Log10 (Inhibitor Conc.)	MEAN	SD	SEM			Bio Rep 1	Bio Rep 2	Bio Rep 3	MEAN	SD	SEM
1000	1.37624	1.16556	1.09403		0.001	-3	1.21194	0.119789	0.06916		EC50 (M)	9.5e-05	0.0001085	9.09e-05
500	5.23296	4.17763	3.2311		0.0005	-3.30103	4.2139	0.817658	0.472075		EC50 (µM)	95	108.5	90.9	98.1333	7.51901	4.3411
250	13.8243	25.8343	9.8433		0.00025	-3.60206	16.5006	6.79707	3.92429
125	37.1089	48.4067	45.1257		0.000125	-3.90309	43.5471	4.74546	2.73979
62.5	66.5638	64.8747	61.5227		6.25e-05	-4.20412	64.3204	2.09498	1.20954
31.3	90.3663	90.4258	84.9969		3.13e-05	-4.50446	88.5963	2.54534	1.46955
16	108.885	86.4243	92.8446		1.6e-05	-4.79588	96.0513	9.44565	5.45345
8	107.965	79.4258	77.0512		8e-06	-5.09691	88.1473	14.0467	8.10989
0	100	100	100
Arabidopsis thaliana Vs. MBDTA-2 (Figure 7B)
	Biological Replicate Average				Plotted Data						EC50
Inhibitor Conc. (µM)	Rep 1	Rep 2	Rep 3		Inhibitor Conc. (M)	Log10 (Inhibitor Conc.)	MEAN	SD	SEM			Bio Rep 1	Bio Rep 2	Bio Rep 3	MEAN	SD	SEM
1000	0.349285	0.976246	0.941098		0.001	-3	0.755543	0.287626	0.166061		EC50 (M)	4.77e-05	4.63e-05	4.81e-05
500	3.33608	4.35894	2.24855		0.0005	-3.30103	3.31453	0.861697	0.497501		EC50 (µM)	47.7	46.3	48.1	47.3667	0.771722	0.445554
250	9.15842	13.4232	6.47697		0.00025	-3.60206	9.68619	2.86023	1.65136
125	18.038	21.1993	17.2276		0.000125	-3.90309	18.8217	1.71349	0.989285
62.5	28.4516	47.6825	41.5744		6.25e-05	-4.20412	39.2362	8.02319	4.63219
31.3	74.802	72.1169	67.0925		3.13e-05	-4.50446	71.3371	3.19533	1.84482
16	93.1417	89.5804	81.9697		1.6e-05	-4.79588	88.2306	4.65975	2.69031
8	90.6436	97.2549	94.4337		8e-06	-5.09691	94.1107	2.7087	1.56387
0	100	100	100
