# Supplementary material for: Towards novel herbicide modes of action by inhibiting lysine biosynthesis in plants
Source: eLife. 2021 Jul 27;10:e69444. doi: 10.7554/eLife.69444 (PMC8341977; doi:10.7554/eLife.69444)
Supplement: Figure 8—source data 1. [file elife-69444-fig8-data1.xlsx]

## Sheet: Sheet1
Arabidopsis thaliana Vs. MBDTA-1/2 (Figure 8)
	Technical Replicate
	Rep 1	Rep 2	Rep 3
300mg/L MBDTA-1	40.0824	38.4302	22.5003
300mg/L MBDTA-2	30.4508	11.0961	3.60157
DMSO Control	100	100	100
