# Supplementary material for: Towards novel herbicide modes of action by inhibiting lysine biosynthesis in plants
Source: eLife. 2021 Jul 27;10:e69444. doi: 10.7554/eLife.69444 (PMC8341977; doi:10.7554/eLife.69444)
Supplement: Table 2—source data 1. [file elife-69444-table2-data1.xlsx]

## Sheet: Sheet1
AtDHDPS1 Vs. MBDTA-1 (Table 2)
	Biological Replicate MIC (µg/mL)
Species	Rep 1	Rep 2	Rep 3
Enterococcus spp.	>128	>128	>128
Staphylococcus aureus	>128	>128	>128
Escherichia coli	>128	>128	>128
	>128	>128	>128
Enterobacter ludwigii	>128	>128	>128
Arthrobacter sp.	>128	>128	>128
Enterobacter cancerogenus	>128	>128	>128
Cedecea davisae	>128	>128	>128
Rhodococcus erthropolis	>128	>128	>128
AtDHDPS1 Vs. MBDTA-2 (Table 2)
	Biological Replicate MIC (µg/mL)
Species	Rep 1	Rep 2	Rep 3
Enterococcus spp.	>128	>128	>128
Staphylococcus aureus	>128	>128	>128
Escherichia coli	>128	>128	>128
	>128	>128	>128
Enterobacter ludwigii	>128	>128	>128
Arthrobacter sp.	>128	>128	>128
Enterobacter cancerogenus	>128	>128	>128
Cedecea davisae	>128	>128	>128
Rhodococcus erthropolis	>128	>128	>128
